# Supplementary material
Source: Research Square preprint supplement (doi:10.21203/rs.3.rs-8823142/v1)
Supplement: Supplementary file 1 [file f75927a74f5643176b9c5f5e.doc]

**Table 4** Facilitators and barriers of oral health behaviors in participants with stage III and stage IV periodontitis based on the COM-B model

| **Component** | **Sub-themes** | **Facilitators** | **Barriers** |
| --- | --- | --- | --- |
| Capability | Disease Awareness and Self-Assessment | - Understanding of accurate disease knowledge | - Initial knowledge gaps - Misattribution of symptoms - Underestimation of the insidious nature and severity of the disease |
| Daily Cleaning Skills | - Acquisition of correct oral hygiene knowledge and methods | - Non-standard skills**​** - The knowing-doing gap |
| Information Acquisition and Identification | - Proactive information seeking | - Challenges in information discrimination​ |
| Healthcare Resource Utilization | - Proficient use of the online appointment systems - Utilization of on-site staff assistance | - Confusion in navigating the healthcare system hierarchy - Confusion in navigating the detailed classification of departments - Lack of foundational knowledge for clinical questioning |
| Opportunity​ | Time and Geography | - Flexible work schedules allowing for medical leave - Availability of appointments on non-working days | - Conflict between work hours and clinic availability - Long-distance travel for medical visit​ - Time-intensive treatment/follow-up protocols​ - Inability to maintain daily care routines due to work/family obligations |
| Cleaning Tools | - Availability of cleaning tools​ - Convenience of cleaning tools​ - Perceived effectiveness of cleaning tools | - Cumbersome nature of cleaning tool use​ - Perceived ineffectiveness or low efficacy of cleaning tools - Quality issues with cleaning tools​ - Discomfort caused by cleaning tool use​ - Safety concerns regarding cleaning tools |
| Family and Society | - Reminders and urging from relatives/friends - Cautionary experiences of relatives/friends - Positive behavioral modeling by relatives/friends | - Relatives/friends' neglect of oral health - Inability to maintain oral health behaviors in specific social contexts​ |
| Healthcare System and Environment | - Accessibility of authoritative dentists - Partial coverage by health insurance​ - Objective and clear explanations by dentists | - Difficulty in obtaining appointments (especially for specialists/weekend) - High cost of treatment - Macro-environment of generally insufficient societal oral disease prevention education |
| Motivation​ | Outcome Expectation and Health Beliefs​ | - Desire to preserve natural teeth - Avoidance of tooth loss - Avoidance of the high costs of dental implants - Expectations for improved appearance and social confidence | - Underestimation of consequences of non-treatment - Negative belief that treatment is "too late" - Negative expectations about treatment outcomes |
| Emotional and Psychological Experience​ | - Sense of relief following treatment - Positive initial treatment experience - Positive experience of finding a competent dentist | - Fear and anxiety regarding dental treatment - Shame and avoidance mentality regarding oral problems - Persistent irritability and psychological pressure caused by the disease |
| Habit and Behavioral Intention​ | - Behavioral intention formed after experiencing severe symptoms​ - Self-identification as an investor in health | - Deeply ingrained old habits that are difficult to change - Passive behavioral patterns |
